# Supplementary material for: TERT Alterations Predict Tumor Progression in De Novo High-Grade Meningiomas Following Adjuvant Radiotherapy
Source: Front Oncol. 2021 Oct 29;11:747592. doi: 10.3389/fonc.2021.747592 (PMC8586415; doi:10.3389/fonc.2021.747592)
Supplement: Supplementary file 3 [file Table_2.xlsx]

## Sheet: Sheet1
Gene mutant	09-716	09-2500	10-410	11-0908	11-1474	11-2165	10-2410	11-2166	11-2255	12-196	12-1140	12-2663	12-3555	13-81	13-1510	13-1774	13-1838	13-2331	13-3134	12-2223	12-3520	12-3583	13-2003	13-2392	13-2478	13-2486	13-2992	10-1051	10-1369	10-1777	10-2988	11-0264	11-0940	11-0966	12-835	11-1480	11-1711	mutation cases	mutation rates (%)
NF2																																						22	59.45
ATRX																																						13	35.14
ARID1A																																						11	29.73
ATM																																						11	29.73
NF1																																						11	29.73
ROS1																																						10	27.03
KDM6A																																						9	24.32
FAT1																																						8	21.62
TERT																																						8	21.62
KDM5C																																						7	18.92
JAK1																																						7	18.92
CREBBP																																						7	18.92
DDX31																																						7	18.92
TSC1																																						7	18.92
NCOR2																																						7	18.92
H3F3A																																						7	18.92
MTOR																																						6	16.22
BCOR																																						6	16.22
ZMYM3																																						6	16.22
KDR																																						6	16.22
POLR2A																																						6	16.22
SYCP2																																						6	16.22
PTCH2																																						6	16.22
RB1																																						5	13.51
SYCP1																																						5	13.51
APC																																						4	10.81
DICER1																																						4	10.81
TP53																																						4	10.81
MET																																						4	10.81
CIC																																						4	10.81
FUBP1																																						4	10.81
ERBB4																																						4	10.81
PTEN																																						4	10.81
SNCAIP																																						4	10.81
EGFR																																						4	10.81
DAXX																																						4	10.81
DDX3X																																						3	8.11
GABRG1																																						3	8.11
SMARCC2																																						3	8.11
PDGFRA																																						3	8.11
MYB																																						3	8.11
MYBL1																																						3	8.11
JAK2																																						3	8.11
KIT																																						3	8.11
KMT2B																																						3	8.11
PPM1D																																						3	8.11
AKT1																																						3	8.11
BCR																																						3	8.11
RET																																						3	8.11
FGFR2																																						3	8.11
ALK																																						2	5.41
ERBB3																																						2	5.41
KDM4C																																						2	5.41
CHD7																																						2	5.41
TSC2																																						2	5.41
MDM2																																						2	5.41
TRAF7																																						2	5.41
GFI1																																						2	5.41
SMARCA4																																						2	5.41
SMAD4																																						2	5.41
PRKAR1A																																						2	5.41
IARS																																						2	5.41
PDE11A																																						2	5.41
TRIP12																																						2	5.41
USP8																																						2	5.41
GLI2																																						2	5.41
PRDM6																																						2	5.41
SMARCD2																																						2	5.41
IDH1																																						2	5.41
BRAF																																						2	5.41
ACVR1																																						2	5.41
NOTCH1																																						2	5.41
KLF4																																						2	5.41
PRKACA																																						2	5.41
MYC																																						2	5.41
CDKN2A																																						2	5.41
ARID1B																																						1	2.7
CHEK2																																						1	2.7
SMARCB1																																						1	2.7
OTX2																																						1	2.7
CDK4																																						1	2.7
ESR1																																						1	2.7
ERBB2																																						1	2.7
RAD21																																						1	2.7
SP100																																						1	2.7
IDH1																																						1	2.7
GFI1B																																						1	2.7
CDH1																																						1	2.7
CDK6																																						1	2.7
KBTBD4																																						1	2.7
LDB1																																						1	2.7
FGFR1																																						1	2.7
FGFR3																																						1	2.7
ABL1																																						1	2.7
ARAF																																						1	2.7
BCL2L11																																						1	2.7
FLT3																																						1	2.7
MAP2K1																																						1	2.7
NRAS																																						1	2.7
NTRK1																																						1	2.7
STK11																																						1	2.7
SMARCE1																																						1	2.7
GRB10																																						1	2.7
GPR101																																						1	2.7
MEN1																																						1	2.7
PDE8B																																						1	2.7
CDKN1B																																						1	2.7
CTNNB1																																						1	2.7
PTCH1																																						0	0
SMO																																						0	0
SUFU																																						0	0
KRAS																																						0	0
YAP1																																						0	0
GNAS																																						0	0
GRIN2A																																						0	0
NR3C1																																						0	0
ABCB1																																						0	0
ABCC2																																						0	0
ACYP2																																						0	0
C8orf34																																						0	0
CBR3																																						0	0
CDA																																						0	0
CEP72																																						0	0
CYP19A1																																						0	0
CYP1B1																																						0	0
CYP2D6																																						0	0
CYP3A4																																						0	0
DPYD																																						0	0
DYNC2H1																																						0	0
ERCC1																																						0	0
ERCC2																																						0	0
GSTP1																																						0	0
IDH2																																						0	0
MTHFR																																						0	0
MTRR																																						0	0
NQO1																																						0	0
NUDT15																																						0	0
PNPLA3																																						0	0
SEMA3C																																						0	0
SLC19A1																																						0	0
SLC28A3																																						0	0
SLCO1B1																																						0	0
SOD2																																						0	0
TPMT																																						0	0
TYMS																																						0	0
UGT1A1																																						0	0
XPC																																						0	0
XRCC1																																						0	0
UGT1A1																																						0	0
UMPS																																						0	0
ARID2																																						0	0
BRPF1																																						0	0
CSNK2B																																						0	0
CTDNEP1																																						0	0
EPHA7																																						0	0
EP300																																						0	0
GPS2																																						0	0
KAT6B																																						0	0
KANSL1																																						0	0
MLL3																																						0	0
MYCN																																						0	0
PIK3CA																																						0	0
IDH2																																						0	0
MGMT																																						0	0
1p/19q																																						0	0
HIST1H3B																																						0	0
HIST1H3C																																						0	0
RELA																																						0	0
CDKN2B																																						0	0
RELA																																						0	0
CCND1																																						0	0
DMD																																						0	0
HRAS																																						0	0
NTRK2																																						0	0
NTRK3																																						0	0
PDGFRB																																						0	0
BAP-1																																						0	0
KIF5A																																						0	0
RAD21L1																																						0	0
AIP																																						0	0
PRKAR1A																																						0	0
GNA11																																						0	0
PAX8																																						0	0
PBRM1																																						0	0
Case number	Progression
Case number	Non-progression
	gene with mutations
